# Supplementary material for: Ruthenium supported on zirconia–carbon nanocomposites derived by using UiO-66 for efficient photothermal catalytic CO2 reduction
Source: Royal Society of Chemistry journal article supplement (doi:10.1039/d4ta01821d), 2024-01-01
Supplement: d4ta01821d1.pdf [file d4ta01821d1.pdf]

# 1 **Electronic Supplementary Information (ESI)**

2 **Ruthenium supported on zirconia-carbon nanocomposites derived by**

3 **UiO-66 for efficient photothermal catalytic CO<sub>2</sub> reduction**

4 Huiling wang <sup>a,b,c</sup>, Qiang Li <sup>b,c,e</sup>, Jing Chen <sup>d,e,\*</sup> and Hongpeng Jia <sup>b,c,e,\*</sup>

5 <sup>a</sup> College of JunCao Science and Ecology (College of Carbon Neutrality), Fujian

6 Agriculture and Forestry University, Fuzhou 350002, China

7 <sup>b</sup> Xiamen Key Laboratory of Materials for Gaseous Pollutant Control, Institute of Urban

8 Environment, Chinese Academy of Sciences, Xiamen 361021, China

9 <sup>c</sup> Key Laboratory of Urban Pollutant Conversion, Institute of Urban Environment,

10 Chinese Academy of Sciences, Xiamen 361021, China

11 <sup>d</sup> Fujian Institute of Research on The Structure of Matter, Chinese Academy of

12 Sciences, Fuzhou 350002, China

13 <sup>e</sup> University of Chinese Academy of Sciences, Beijing 100049, China

14 \* Corresponding authors

15 E-mail addresses: jing.chen@fjirsm.ac.cn & hpjia@iue.ac.cn

16 Tel: 86-592-6190767; Fax: 86-592-6190767

17

## Contents

|    |                                                                                                                           |    |
|----|---------------------------------------------------------------------------------------------------------------------------|----|
| 1  |                                                                                                                           |    |
| 2  | This file contains 10 figures and 2 tables.                                                                               |    |
| 3  | Supplementary Materials Include:                                                                                          |    |
| 4  | <b>Fig.S1</b> the images of ZrO <sub>2</sub> , ZrO <sub>2</sub> /C, Ru/ZrO <sub>2</sub> , and Ru-ZrO <sub>2</sub> /C..... | 3  |
| 5  | <b>Fig.S2</b> XRD patterns of xRu-ZrO <sub>2</sub> /C with different Ru loading .....                                     | 4  |
| 6  | <b>Fig.S3</b> SEM and HRTEM images of ZrO <sub>2</sub> /C and ZrO <sub>2</sub> .....                                      | 5  |
| 7  | <b>Fig.S4</b> Production rate of ZrO <sub>2</sub> /C and Ru-ZrO <sub>2</sub> /C.....                                      | 6  |
| 8  | <b>Fig.S5</b> Thermogravimetry analysis and derivative thermogravimetry (TGA-DTG)                                         |    |
| 9  | curve of Ru-ZrO <sub>2</sub> /C.....                                                                                      | 7  |
| 10 | <b>Fig.S6</b> The production rate in the initial second hour of Ru-ZrO <sub>2</sub> /C with different Ru                  |    |
| 11 | loading amounts at the light intensity of 2614 mW cm <sup>-2</sup> .....                                                  | 8  |
| 12 | <b>Fig.S7</b> (a) Continuous stability test of photothermal CO <sub>2</sub> reduction over Ru-ZrO <sub>2</sub> /C         |    |
| 13 | under the light intensity of 2858 mW cm <sup>-2</sup> for 24 h. (b) The catalytic durability for                          |    |
| 14 | CO <sub>2</sub> reduction over Ru-ZrO <sub>2</sub> /C under the light intensity of 2858 mW cm <sup>-2</sup> , lasting     |    |
| 15 | within at least 24 h (each cycle for 4 h, 6 cycles).....                                                                  | 9  |
| 16 | <b>Fig. S8</b> (a) photocurrent test of Ru/ZrO <sub>2</sub> and Ru-ZrO <sub>2</sub> /C; (b) EIS Nyquist plots under       |    |
| 17 | irradiation of Ru/ZrO <sub>2</sub> and Ru-ZrO <sub>2</sub> /C.....                                                        | 10 |
| 18 | <b>Fig. S9</b> XRD patterns of Ru-ZrO <sub>2</sub> /C and Ru-ZrO <sub>2</sub> /C-3h.....                                  | 11 |
| 19 | <b>Fig. S10</b> Ru 3p and O 1s of the Ru/ZrO <sub>2</sub> . ....                                                          | 12 |
| 20 | <b>Table S1</b> Catalytic activity for CH <sub>4</sub> production via photo-thermal route in the reported                 |    |
| 21 | literature .....                                                                                                          | 13 |
| 22 | <b>Table S2</b> Vibrational wavenumbers were measured in this work and collected from                                     |    |
| 23 | the literature .....                                                                                                      | 14 |
| 24 |                                                                                                                           |    |
| 25 |                                                                                                                           |    |

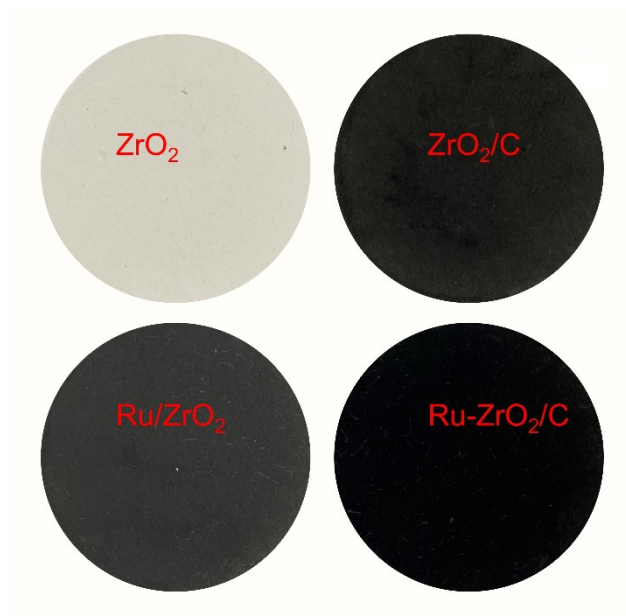

1  
2 **Fig. S1** the images of  $ZrO_2$ ,  $ZrO_2/C$ ,  $Ru/ZrO_2$ , and  $Ru-ZrO_2/C$ .  
3  
4

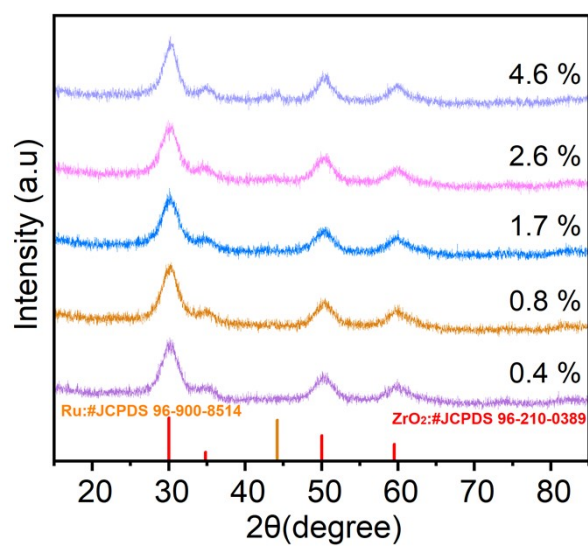

1

2 **Fig. S2** XRD patterns of xRu-ZrO<sub>2</sub>/C with different Ru loading amounts, ZrO<sub>2</sub> represents JCPDS

3 PDF # 96-210-038, and Ru represents JCPDS PDF # 96-900-8514.

4

5

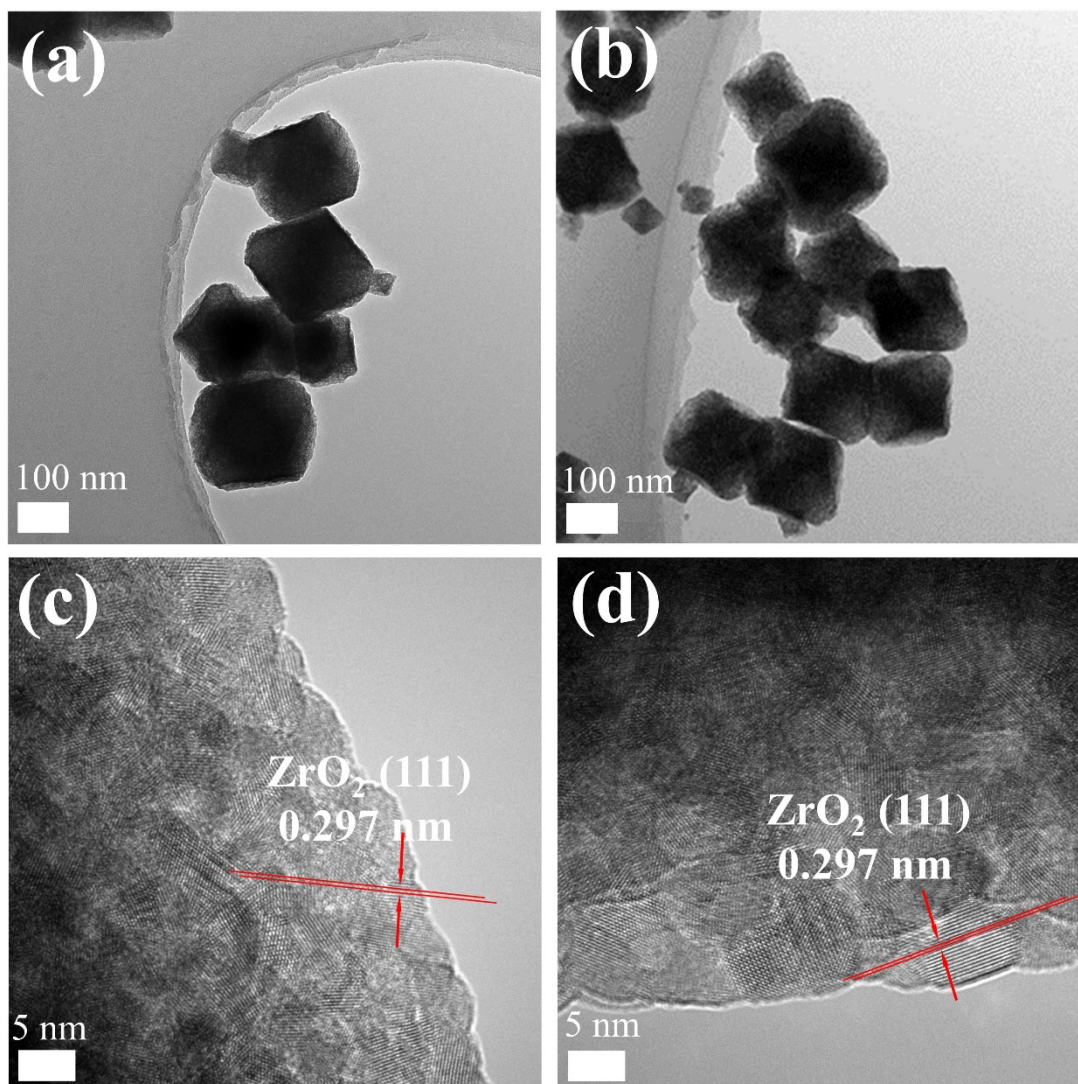

1  
2 **Fig. S3** SEM and HRTEM images. (a–b) TEM images of ZrO<sub>2</sub>/C and ZrO<sub>2</sub>; (c–d) HRTEM images  
3 of ZrO<sub>2</sub>/C and ZrO<sub>2</sub>, respectively.

4  
5

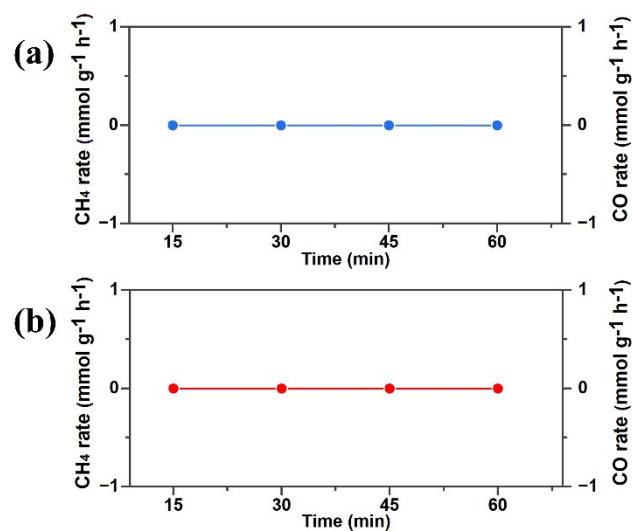

1

2 **Fig. S4** (a) Production rate of ZrO<sub>2</sub>/C with a continuous flow of 10 vol.% CO<sub>2</sub>, 40 vol.% H<sub>2</sub>, and

3 50 vol.% He (25 mL/min); (b) Production rate of Ru-ZrO<sub>2</sub>/C with a continuous flow of 5% vol.%

4 H<sub>2</sub> and 95% vol.% Ar (25 mL/min). Reaction condition: the samples were irradiated under full-

5 spectrum irradiation with light intensities (2614 mW cm<sup>-2</sup>).

6

7

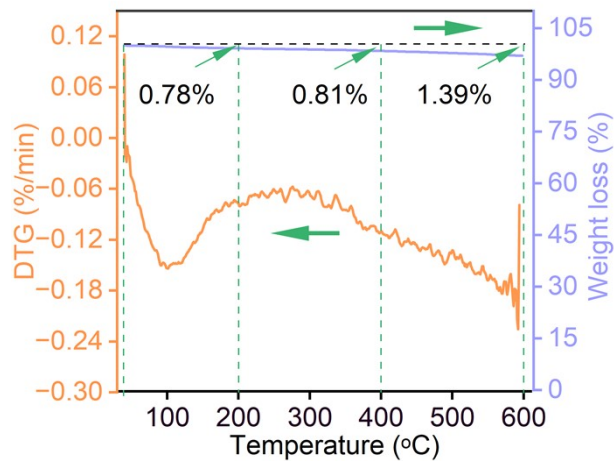

1

2 **Fig. S5** Thermogravimetry analysis and derivative thermogravimetry (TGA-DTG) curve of

3 Ru-ZrO<sub>2</sub>/C

4

5

1

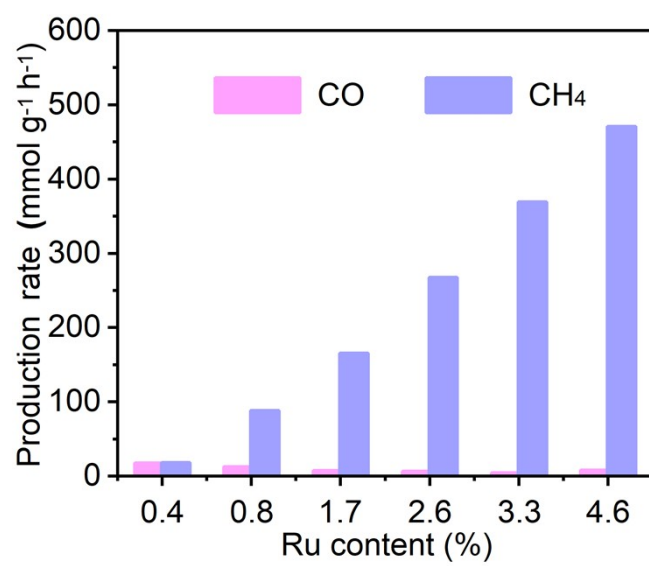

2

3 **Fig. S6** The production rate in the initial second hours of Ru-ZrO<sub>2</sub>/C with different Ru loading

4 amounts at the light intensity of 2614 mW cm<sup>-2</sup>.

5

6



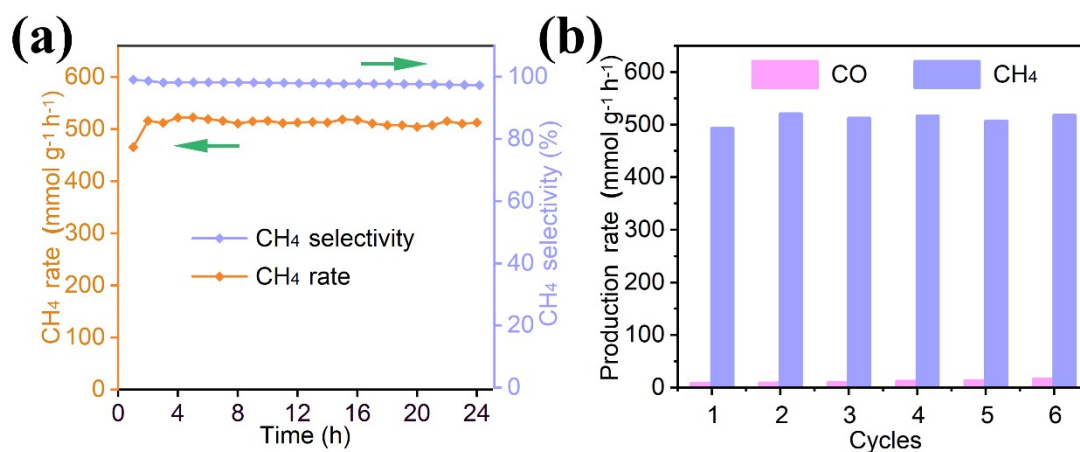

1

2 **Fig. S7** (a) Continuous stability test of photothermal CO<sub>2</sub> reduction over Ru-ZrO<sub>2</sub>/C under the light

3 intensity of 2858 mW cm<sup>-2</sup> for 24 h. (b) The catalytic durability for CO<sub>2</sub> reduction over Ru-ZrO<sub>2</sub>/C

4 under the light intensity of 2858 mW cm<sup>-2</sup>, lasting within at least 24 h (each cycle for 4 h, 6 cycles)

5

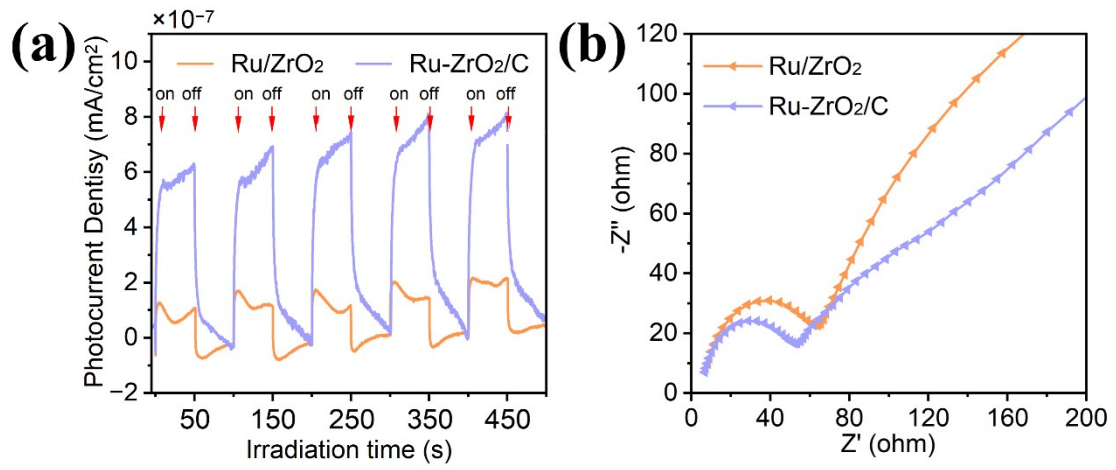

1

2 Fig. S8 (a) photocurrent test of Ru/ZrO<sub>2</sub> and Ru-ZrO<sub>2</sub>/C; (b) EIS Nyquist plots under irradiation of

3 Ru/ZrO<sub>2</sub> and Ru-ZrO<sub>2</sub>/C

4

5

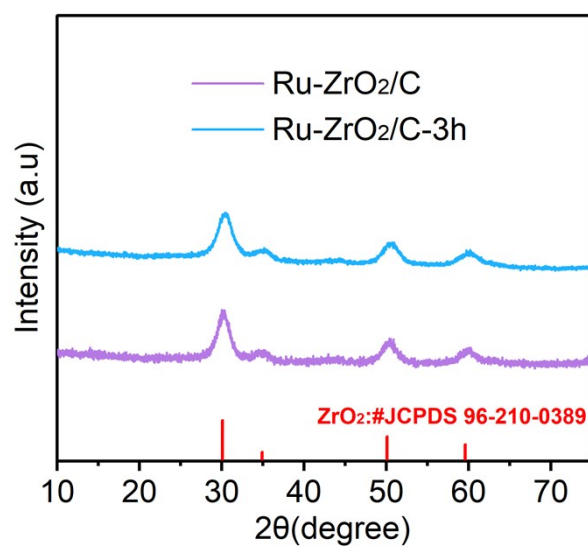

1

2 **Fig. S9** XRD patterns of Ru-ZrO<sub>2</sub>/C and Ru-ZrO<sub>2</sub>/C-3h, ZrO<sub>2</sub> represents JCPDS PDF # 96-210-

3 038.

4

5

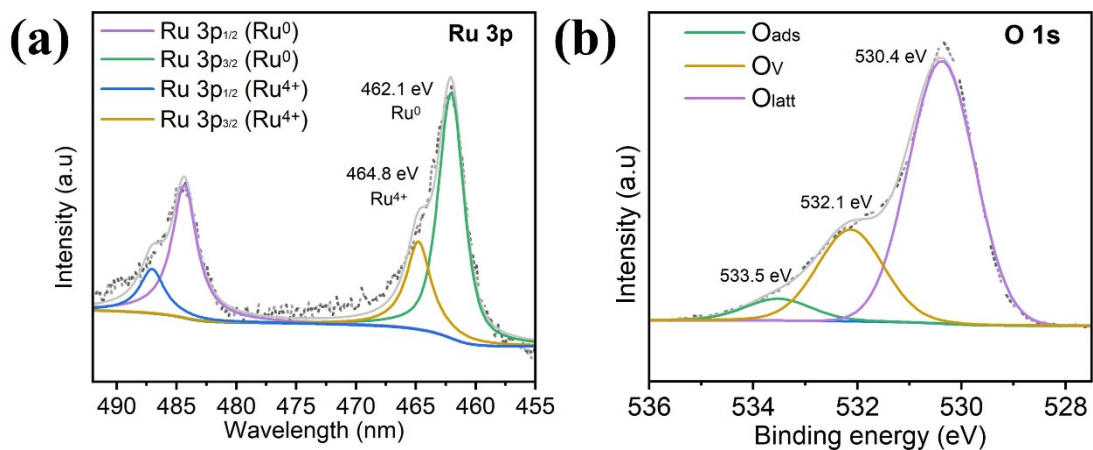

1  
 2 **Fig. S10** Ru 3p and O 1s of the Ru-ZrO<sub>2</sub>/C-3h, respectively.  
 3  
 4

1 **Table S1** Catalytic activity for CH<sub>4</sub> production via photo-thermal route in the reported  
 2 literature

| <b>Catalysts</b>                                 | <b>Surface temperature (°C)</b> | <b>CH<sub>4</sub> production (mmol g<sub>cat</sub><sup>-1</sup>h<sup>-1</sup>)</b> | <b>Literature</b>  |
|--------------------------------------------------|---------------------------------|------------------------------------------------------------------------------------|--------------------|
| Ru-ZrO <sub>2</sub> /C                           | 370                             | 504.1                                                                              | This work          |
| Ru/CeO <sub>2</sub>                              | 365                             | 16.8                                                                               | Ref. <sup>1</sup>  |
| Ru/MnO-MgCO <sub>3</sub>                         | 400                             | 50.7                                                                               | Ref. <sup>2</sup>  |
| Ru@Ni <sub>2</sub> V <sub>2</sub> O <sub>7</sub> | 350                             | 114.9                                                                              | Ref. <sup>3</sup>  |
| Ru@FL-LDH                                        | 350                             | 277.0                                                                              | Ref. <sup>4</sup>  |
| Ru/pBN-1.76%F                                    | 400                             | 115.7                                                                              | Ref. <sup>5</sup>  |
| 3Ru/CeO <sub>2</sub>                             | 350                             | 227.7                                                                              | Ref. <sup>6</sup>  |
| 5%Ru/Al <sub>2</sub> O <sub>3</sub>              | 400                             | 271.0                                                                              | Ref. <sup>7</sup>  |
| 5%Ru/CeO <sub>2</sub>                            | 400                             | 147.0                                                                              | Ref. <sup>7</sup>  |
| 12Co/MnO                                         | 420                             | 121.4                                                                              | Ref. <sup>8</sup>  |
| Ru/Al <sub>2</sub> O <sub>3</sub> -B             | 350                             | 34.3                                                                               | Ref. <sup>9</sup>  |
| Ni@CeO <sub>2</sub>                              | 420                             | 257.4                                                                              | Ref. <sup>10</sup> |

3

4

1 **Table S2** Vibrational wavenumbers were measured in this work and collected from  
2 the literature.

| <b>Position (cm<sup>-1</sup>)</b> | <b>corresponding</b>            | <b>Literature</b>      |
|-----------------------------------|---------------------------------|------------------------|
| 1230                              | HCOO*                           | Ref. <sup>11</sup>     |
| 1513,1547,1581                    | b-CO <sub>3</sub> <sup>2-</sup> | Ref. <sup>12</sup>     |
| 1641                              | CH <sub>3</sub> O <sup>-</sup>  | Ref. <sup>13, 14</sup> |
| 1900-2100                         | CO                              | Ref. <sup>15, 16</sup> |
| 1305,3016                         | CH <sub>4</sub>                 | Ref. <sup>17, 11</sup> |

3

4

## 1 Reference

1. T. Zhang, P. Zhang, F. Gu, W. Xu, W. Chen, T. Zhu, Y. Han, G. Xu, Z. Zhong and F. Su, *Appl. Catal., B.*, 2023, **323**, 122190.
2. Q. Wang, Y. Gao, C. Tumurbaatar, T. Bold, F. Wei, Y. Dai and Y. Yang, *J. Energy Chem.*, 2022, **64**, 38-46.
3. Y. Chen, Y. Zhang, G. Fan, L. Song, G. Jia, H. Huang, S. Ouyang, J. Ye, Z. Li and Z. Zou, *Joule*, 2021, **5**, 3235-3251.
4. J. Ren, S. Ouyang, H. Xu, X. Meng, T. Wang, D. Wang and J. Ye, *Adv. Energy Mater.*, 2017, **7**, 1601657.
5. M. Fan, J. Jimenez, S. Shirodkar, J. Wu, S. Chen, L. Song, M. Royko, J. Zhang, H. Guo, J. Cui, K. Zuo, W. Wang, C. Zhang, F. Yuan, R. Vajtai, J. Qian, J. Yang, B. Yakobson, J. Tour, J. Lauterbach and P. Ajayan, *ACS Catal.*, 2019, **9**, 10077-10086.
6. S. L'opez-Rodríguez, A. Dav' o-Quiñonero, E. Bail'on-García, D. Lozano-Castell' o and A. Bueno-L'opez, *Mol. Catal.*, 2021, **515**, 111911.
7. M. Hatzisymeon, A. Petala and P. Panagiotopoulou, *Catal. Lett.*, 2020, **151**, 888-900.
8. S. Miao, S. Chen, J. Zeng, Z. Gou, C. Huang, X. Wang and G. Zhou, *Fuel*, 2024, **362**, 130853.
9. W. Wang, J. Zhang, G. Fan and F. Li, *Energy Fuels*, 2023, **37**, 8386-8397.
10. J. Ma, T. Liu, G. Chen, S. Liu, W. Gong, Y. Bai, H. Liu, Y. Wang, D. Liu, R. Long, Y. Li and Y. Xiong, *Appl. Catal., B.*, 2024, **344**, 123600.
11. X. Zu, Y. Zhao, X. Li, R. Chen, W. Shao, Z. Wang, J. Hu, J. Zhu, Y. Pan, Y. Sun and Y. Xie, *Angew. Chem. Int. Ed.*, 2021, **60**, 13840-13846.
12. A. Li, Q. Cao, G. Zhou, B. Schmidt, W. Zhu, X. Yuan, H. Huo, J. Gong and M. Antonietti, *Angew. Chem. Int. Ed.*, 2019, **131**, 14691-14697.
13. S. Cai, M. Zhang, J. Li, J. Chen and H. Jia, *Solar RRL*, 2020, **5**, 2000313.
14. X. Li, Y. Sun, J. Xu, Y. Shao, J. Wu, X. Xu, Y. Pan, J. Zhu and Y. Xie, *Nat. Energy*, 2019, **4**, 690-699.
15. N. Ruia, X. Zhang, F. Zhang, Z. Liu, X. Cao, Z. Xie, R. Zou, S. Senanayakeb, Y. Yang, J. Rodriguez and C. Liu, *Appl. Catal., B.*, 2021, **282**, 119581.
16. X. Jia, X. Zhang, N. Rui, X. Hu and C. Liu, *Appl. Catal., B.*, 2019, **244**, 159-169.

- 1 17. T. Yan, L. Wang, Y. Liang, M. Makaremi, T. Wood, Y. Dai, B. Huang, F. Ali, Y. Dong and G.
- 2 Ozin, *Nat. Commun.*, 2019, **10**, 2521.
- 3
